# Supplementary material
Source: Springer Nature journal article supplement (https://www.springermedizin.de/resource/supplementary/12888_2010_777_MOESM2_ESM.pdf/9478716)
Supplement: MOESM2 [file 9478716]

## Reasons for dropping toolkit items

| Item                                                                                                                          | Reason for dropping item                    |
|-------------------------------------------------------------------------------------------------------------------------------|---------------------------------------------|
| Other doctor employed in the unit                                                                                             | Missing data*                               |
| Other doctor FTE                                                                                                              | Missing data*                               |
| The unit provides a television for patients/residents                                                                         | Narrow response range                       |
| The unit provides a radio for patients/residents                                                                              | Narrow response range                       |
| Patients/residents can choose paintings or posters for their bedroom                                                          | Narrow response range                       |
| Patients/residents have their own key to their own lockable storage                                                           | Narrow response range                       |
| Lockable storage located in staff office                                                                                      | Too detailed                                |
| Lockable storage located in patient/resident's bedroom                                                                        | Too detailed                                |
| Lockable storage located elsewhere                                                                                            | Too detailed                                |
| Where is lockable storage if elsewhere?                                                                                       | Too detailed                                |
| There is a single sex communal area                                                                                           | Narrow response range                       |
| There is single sex outside space                                                                                             | Narrow response range                       |
| Patients/residents allowed to have visitors in their room                                                                     | Unable to agree on scoring                  |
| Access to public transport is within 10 minutes of the facility                                                               | Narrow response range                       |
| How involved staff are in management of medication                                                                            | Narrow response range                       |
| Helping patients/residents understand their mental health problems through one-to-one discussions                             | Narrow response range                       |
| Helping patients/residents understand their mental health problems through staff involvement in outside groups                | Unit manager unable to answer/missing data* |
| Staff discussions with patient/resident facilitates their involvement in activities                                           | Narrow response range                       |
| Allocated worker is involved in creating individualised care plans                                                            | Narrow response range                       |
| Other unit staff are involved in creating individualised care plans                                                           | Narrow response range                       |
| Deciding what to wear is generally decided by the resident themselves                                                         | Narrow response range                       |
| Deciding what to watch on TV is generally decided by the resident themselves                                                  | Narrow response range                       |
| Deciding what music to listen to is generally decided by the resident themselves                                              | Narrow response range                       |
| Non-detained patients/residents are free to decide to have consensual sexual relationships outside the unit                   | Narrow response range                       |
| Proportion of patients/residents who have financial hardship because of the contribution they have to make for their own care | Unit manager unable to answer/missing data* |

\*> 30% data missing
